# Supplementary material for: HIStory of LAND transformation by humans in South America (HISLAND-SA): annual and 1-km crop-specific gridded data (1950–2020)
Source: Copernicus journal article supplement (doi:10.5194/essd-2024-527), 2025-01-27
Supplement: Supplementary file 1 [file essd-2024-527-supplement.pdf]

*Supplementary Information of*

**HIStory of LAND transformation by humans in South America (HISLAND-SA): annual and 1-km crop-specific gridded data (1950-2020)**

Binyuan Xu<sup>1,2</sup>, Hanqin Tian<sup>1,3</sup>, Shufen Pan<sup>1,4</sup>, Xiaoyong Li<sup>1,5</sup>, Ran Meng<sup>6,13</sup>, Óscar Melo<sup>7</sup>, Anne McDonald<sup>8</sup>, María de los Ángeles Picone<sup>9</sup>, Xiao-Peng Song<sup>10</sup>, Edson Severnini<sup>1</sup>, Katharine G. Young<sup>11</sup>, Feng Zhao<sup>12</sup>

<sup>1</sup> Center for Earth System Science and Global Sustainability (CES<sup>3</sup>), Schiller Institute for Integrated Science and Society, Boston College, Chestnut Hill, MA 20467, USA

<sup>2</sup> College of Resources and Environment, Huazhong Agricultural University, Wuhan 430000, China

<sup>3</sup> Department of Earth and Environmental Sciences, Boston College, Chestnut Hill, MA 02467, USA

<sup>4</sup> Department of Engineering, Boston College, Chestnut Hill, MA 02467, USA

<sup>5</sup> School of Civil Engineering and Geomatics, Shandong University of Technology, Zibo 255000, China

<sup>6</sup> School of Computer Science and Technology, Harbin Institute of Technology, Harbin 150006, China

<sup>7</sup> Centro de Cambio Global UC, Dept. of Agricultural Economics, Pontificia Universidad Católica de Chile, Vicuña Mackenna 4860, Santiago 7820436, Chile.

<sup>8</sup> Graduate School of Global Environmental Studies, Sophia University, Tokyo 102-8554, Japan

<sup>9</sup> Department of History, Boston College, Chestnut Hill, MA 02467, USA

<sup>10</sup> Department of Geographical Sciences, University of Maryland, College Park, MD 20742, USA

<sup>11</sup> Boston College Law School, Boston, MA 02459, USA

<sup>12</sup> Key Laboratory of Sustainable Forest Ecosystem Management-Ministry of Education; College of Forestry, Northeast Forestry University, Harbin 150040, China

<sup>13</sup> National Key Laboratory of Smart Farm Technologies and Systems, Harbin, Heilongjiang 150006, China

*Correspondence to:* Hanqin Tian ([hanqin.tian@bc.edu](mailto:hanqin.tian@bc.edu))

Table S1. Detailed information of inventory datasets used in this study.

| Country   | Data type | Resolution | Period                                         | Item     | Source                                                                                                                                                                                                                                                                                                                                                                                                                                                                                                                                                                                                                                                                                                                                                                            |
|-----------|-----------|------------|------------------------------------------------|----------|-----------------------------------------------------------------------------------------------------------------------------------------------------------------------------------------------------------------------------------------------------------------------------------------------------------------------------------------------------------------------------------------------------------------------------------------------------------------------------------------------------------------------------------------------------------------------------------------------------------------------------------------------------------------------------------------------------------------------------------------------------------------------------------|
| Argentina | Crop type | National   | 1947, 1952, 1970, 1980, 1990, 1995, 2000, 2011 | 10 crops | <b>Censo Nacional Agropecuario 1952:</b><br><a href="https://www.patagonia3mil.com.ar/wp-content/uploads/libros/publicaciones-Decires.pdf">https://www.patagonia3mil.com.ar/wp-content/uploads/libros/publicaciones-Decires.pdf</a> .                                                                                                                                                                                                                                                                                                                                                                                                                                                                                                                                             |
|           |           |            | 1960                                           | crops    | <b>Censo Nacional Agropecuario 1960:</b><br><a href="https://biblioteca.indec.gob.ar/cgi-bin/wxis.exe/iah/scripts/?IsisScript=iah.xis&amp;lang=es&amp;base=minde&amp;nextAction=lnk&amp;exprSearch=CERDOS&amp;indexSearch=DD#:~:text=Autor%20Institucional%3A%20Argentina.%20Direcci%C3%B3n%20Nacional%20de%20Estad%C3%ADstica%20y,Fe%2C%20Santiago%20del%20Esteros%2C%20Tucum%C3%A1n%2C%20Tierra%20del%20Fuego.">https://biblioteca.indec.gob.ar/cgi-bin/wxis.exe/iah/scripts/?IsisScript=iah.xis&amp;lang=es&amp;base=minde&amp;nextAction=lnk&amp;exprSearch=CERDOS&amp;indexSearch=DD#:~:text=Autor%20Institucional%3A%20Argentina.%20Direcci%C3%B3n%20Nacional%20de%20Estad%C3%ADstica%20y,Fe%2C%20Santiago%20del%20Esteros%2C%20Tucum%C3%A1n%2C%20Tierra%20del%20Fuego.</a> |
|           |           |            | 1969 - 2022                                    | crops    | <b>Agricultural Estimates: FAO based</b><br><a href="https://datosestimaciones.magyp.gob.ar/reportes.php?reporte=Estimaciones">https://datosestimaciones.magyp.gob.ar/reportes.php?reporte=Estimaciones</a>                                                                                                                                                                                                                                                                                                                                                                                                                                                                                                                                                                       |
|           |           |            | 1961-2021                                      | crops    | <b>FAO:</b><br><a href="https://www.fao.org/faostat/zh/#data/QCL">https://www.fao.org/faostat/zh/#data/QCL</a>                                                                                                                                                                                                                                                                                                                                                                                                                                                                                                                                                                                                                                                                    |
|           |           | State      | 1960                                           | crops    | <b>Censo Nacional Agropecuario 1960:</b><br><a href="https://biblioteca.indec.gob.ar/cgi-bin/wxis.exe/iah/scripts/?IsisScript=iah.xis&amp;lang=es&amp;base=minde&amp;nextAction=lnk&amp;exprSearch=CERDOS&amp;indexSearch=DD#:~:text=Autor%20Institucional%3A%20Argentina.%20Direcci%C3%B3n%20Nacional%20de%20Estad%C3%ADstica%20y,Fe%2C%20Santiago%20del%20Esteros%2C%20Tucum%C3%A1n%2C%20Tierra%20del%20Fuego.">https://biblioteca.indec.gob.ar/cgi-bin/wxis.exe/iah/scripts/?IsisScript=iah.xis&amp;lang=es&amp;base=minde&amp;nextAction=lnk&amp;exprSearch=CERDOS&amp;indexSearch=DD#:~:text=Autor%20Institucional%3A%20Argentina.%20Direcci%C3%B3n%20Nacional%20de%20Estad%C3%ADstica%20y,Fe%2C%20Santiago%20del%20Esteros%2C%20Tucum%C3%A1n%2C%20Tierra%20del%20Fuego.</a> |
|           |           |            | 1969 - 2022                                    | crops    | <b>Agricultural Estimates: FAO based</b><br><a href="https://datosestimaciones.magyp.gob.ar/reportes.php?reporte=Estimaciones">https://datosestimaciones.magyp.gob.ar/reportes.php?reporte=Estimaciones</a>                                                                                                                                                                                                                                                                                                                                                                                                                                                                                                                                                                       |
|           |           |            | 1988                                           | crops    | <b>AgroMaps:</b><br><a href="https://gaez.fao.org/pages/agromaps">https://gaez.fao.org/pages/agromaps</a>                                                                                                                                                                                                                                                                                                                                                                                                                                                                                                                                                                                                                                                                         |

|  |          |           |             |                           |                                                                                                                                                                                                                                                                                                                                                                                                                                                                                                                                                                                                                                                                                                                                                                                 |
|--|----------|-----------|-------------|---------------------------|---------------------------------------------------------------------------------------------------------------------------------------------------------------------------------------------------------------------------------------------------------------------------------------------------------------------------------------------------------------------------------------------------------------------------------------------------------------------------------------------------------------------------------------------------------------------------------------------------------------------------------------------------------------------------------------------------------------------------------------------------------------------------------|
|  |          |           | 2002        | crops                     | <b>Censo Nacional Agropecuario 2002:</b><br><a href="https://sitioanterior.indec.gob.ar/cna_index.asp">https://sitioanterior.indec.gob.ar/cna_index.asp</a>                                                                                                                                                                                                                                                                                                                                                                                                                                                                                                                                                                                                                     |
|  |          |           | 2008        | crops                     | <b>Censo Nacional Agropecuario 2008:</b><br><a href="https://microdata.fao.org/index.php/catalog/1610/related-materials">https://microdata.fao.org/index.php/catalog/1610/related-materials</a>                                                                                                                                                                                                                                                                                                                                                                                                                                                                                                                                                                                 |
|  |          |           | 2018        | crops                     | <b>Censo Nacional Agropecuario 2018:</b><br><a href="https://www.indec.gob.ar/indec/web/Nivel4-Tema-3-8-87">https://www.indec.gob.ar/indec/web/Nivel4-Tema-3-8-87</a>                                                                                                                                                                                                                                                                                                                                                                                                                                                                                                                                                                                                           |
|  |          | Municipal | 1960        | crops                     | <b>Censo Nacional Agropecuario 1960:</b><br><a href="https://biblioteca.indec.gob.ar/cgi-bin/wxis.exe/iah/scripts/?IsisScript=iah.xis&amp;lang=es&amp;base=minde&amp;nextAction=lnk&amp;exprSearch=CERDOS&amp;indexSearch=DD#:~:text=Autor%20Institucional%3A%20Argentina.%20Direcci%C3%B3n%20Nacional%20de%20Estad%C3%ADstica%20y,Fe%2C%20Santiago%20del%20Estero%2C%20Tucum%C3%A1n%2C%20Tierra%20del%20Fuego.">https://biblioteca.indec.gob.ar/cgi-bin/wxis.exe/iah/scripts/?IsisScript=iah.xis&amp;lang=es&amp;base=minde&amp;nextAction=lnk&amp;exprSearch=CERDOS&amp;indexSearch=DD#:~:text=Autor%20Institucional%3A%20Argentina.%20Direcci%C3%B3n%20Nacional%20de%20Estad%C3%ADstica%20y,Fe%2C%20Santiago%20del%20Estero%2C%20Tucum%C3%A1n%2C%20Tierra%20del%20Fuego.</a> |
|  |          |           | 1969 - 2022 | crops                     | <b>Agricultural Estimates:</b><br><a href="https://datosestimaciones.magyp.gob.ar/reportes.php?reporte=Estimaciones">https://datosestimaciones.magyp.gob.ar/reportes.php?reporte=Estimaciones</a>                                                                                                                                                                                                                                                                                                                                                                                                                                                                                                                                                                               |
|  |          |           | 2008        | crops                     | <b>Censo Nacional Agropecuario 2008:</b><br><a href="https://microdata.fao.org/index.php/catalog/1610/related-materials">https://microdata.fao.org/index.php/catalog/1610/related-materials</a>                                                                                                                                                                                                                                                                                                                                                                                                                                                                                                                                                                                 |
|  |          |           | 2018        | crops                     | <b>Censo Nacional Agropecuario 2018:</b><br><a href="https://www.indec.gob.ar/indec/web/Nivel4-Tema-3-8-87">https://www.indec.gob.ar/indec/web/Nivel4-Tema-3-8-87</a>                                                                                                                                                                                                                                                                                                                                                                                                                                                                                                                                                                                                           |
|  | Land use | National  | 1961-2021   | Cropland, pasture, forest | FAO:<br><a href="https://www.fao.org/faostat/zh/#data/RL">https://www.fao.org/faostat/zh/#data/RL</a>                                                                                                                                                                                                                                                                                                                                                                                                                                                                                                                                                                                                                                                                           |
|  |          | State     | 1960        | Cropland, pasture, forest | <b>Censo Nacional Agropecuario 1960:</b><br><a href="https://biblioteca.indec.gob.ar/cgi-bin/wxis.exe/iah/scripts/?IsisScript=iah.xis&amp;lang=es&amp;base=minde&amp;nextAction=lnk&amp;exprSearch=CERDOS&amp;indexSearch=DD#:~:text=Autor%20Institucional%3A%20Argentina.%20Direcci%C3%B3n%20Nacional%20de%20Estad%C3%ADstica%20y,Fe%2C%20Santiago%20del%20Estero%2C%20Tucum%C3%A1n%2C%20Tierra%20del%20Fuego.">https://biblioteca.indec.gob.ar/cgi-bin/wxis.exe/iah/scripts/?IsisScript=iah.xis&amp;lang=es&amp;base=minde&amp;nextAction=lnk&amp;exprSearch=CERDOS&amp;indexSearch=DD#:~:text=Autor%20Institucional%3A%20Argentina.%20Direcci%C3%B3n%20Nacional%20de%20Estad%C3%ADstica%20y,Fe%2C%20Santiago%20del%20Estero%2C%20Tucum%C3%A1n%2C%20Tierra%20del%20Fuego.</a> |

|         |           |           |           |                           |                                                                                                                                                                                                                                                                                                                                                                                                                                                                                                                                                                                                                                                                                                                                                                           |
|---------|-----------|-----------|-----------|---------------------------|---------------------------------------------------------------------------------------------------------------------------------------------------------------------------------------------------------------------------------------------------------------------------------------------------------------------------------------------------------------------------------------------------------------------------------------------------------------------------------------------------------------------------------------------------------------------------------------------------------------------------------------------------------------------------------------------------------------------------------------------------------------------------|
|         |           |           |           |                           | <a href="#">%ADstica%20y,Fe%2C%20Santiago%20del%20Ester%2C%20Tucum%2C%A1n%2C%20Tierra%20del%20Fuego.</a>                                                                                                                                                                                                                                                                                                                                                                                                                                                                                                                                                                                                                                                                  |
|         |           |           | 2002      | Cropland, pasture, forest | <b>Censo Nacional Agropecuario 2002:</b><br><a href="https://sitioanterior.indec.gob.ar/cna_index.asp">https://sitioanterior.indec.gob.ar/cna_index.asp</a>                                                                                                                                                                                                                                                                                                                                                                                                                                                                                                                                                                                                               |
|         |           |           | 2008      | Cropland, pasture, forest | <b>Censo Nacional Agropecuario 2008:</b><br><a href="https://microdata.fao.org/index.php/catalog/1610/related-materials">https://microdata.fao.org/index.php/catalog/1610/related-materials</a>                                                                                                                                                                                                                                                                                                                                                                                                                                                                                                                                                                           |
|         |           |           | 2018      | Cropland, pasture, forest | <b>Censo Nacional Agropecuario 2018:</b><br><a href="https://www.indec.gob.ar/indec/web/Nivel4-Tema-3-8-87">https://www.indec.gob.ar/indec/web/Nivel4-Tema-3-8-87</a>                                                                                                                                                                                                                                                                                                                                                                                                                                                                                                                                                                                                     |
|         |           | Municipal | 1960      | Cropland, pasture, forest | <b>Censo Nacional Agropecuario 1960:</b><br><a href="https://biblioteca.indec.gob.ar/cgi-bin/wxis.exe/iah/scripts/?IsisScript=iah.xis&amp;lang=es&amp;base=minde&amp;nextAction=lnk&amp;exprSearch=CERDOS&amp;indexSearch=DD#:~:text=Autor%20Institucional%3A%20Argentina.%20Direcci%20B3n%20Nacional%20de%20Estad%20ADstica%20y,Fe%2C%20Santiago%20del%20Ester%2C%20Tucum%2C%A1n%2C%20Tierra%20del%20Fuego.">https://biblioteca.indec.gob.ar/cgi-bin/wxis.exe/iah/scripts/?IsisScript=iah.xis&amp;lang=es&amp;base=minde&amp;nextAction=lnk&amp;exprSearch=CERDOS&amp;indexSearch=DD#:~:text=Autor%20Institucional%3A%20Argentina.%20Direcci%20B3n%20Nacional%20de%20Estad%20ADstica%20y,Fe%2C%20Santiago%20del%20Ester%2C%20Tucum%2C%A1n%2C%20Tierra%20del%20Fuego.</a> |
|         |           |           | 2008      | Cropland, pasture, forest | <b>Censo Nacional Agropecuario 2008:</b><br><a href="https://microdata.fao.org/index.php/catalog/1610/related-materials">https://microdata.fao.org/index.php/catalog/1610/related-materials</a>                                                                                                                                                                                                                                                                                                                                                                                                                                                                                                                                                                           |
|         |           |           | 2018      | Cropland, pasture, forest | <b>Censo Nacional Agropecuario 2018:</b><br><a href="https://www.indec.gob.ar/indec/web/Nivel4-Tema-3-8-87">https://www.indec.gob.ar/indec/web/Nivel4-Tema-3-8-87</a>                                                                                                                                                                                                                                                                                                                                                                                                                                                                                                                                                                                                     |
| Bolivia | Crop type | State     | 1950      | crops                     | <b>Censo Nacional Agropecuario 1950:</b><br><a href="https://es.scribd.com/doc/152215679/I-Censo-Agropecuario1950?doc_id=152215679&amp;download=true&amp;order=611811074#">https://es.scribd.com/doc/152215679/I-Censo-Agropecuario1950?doc_id=152215679&amp;download=true&amp;order=611811074#</a>                                                                                                                                                                                                                                                                                                                                                                                                                                                                       |
|         |           |           | 1984-2022 | crops                     | <b>Instituto Nacional de Estadística:</b><br><a href="https://www.ine.gob.bo/index.php/estadisticas-economicas/agropecuaria/agricultura-cuadros-estadisticos/#">https://www.ine.gob.bo/index.php/estadisticas-economicas/agropecuaria/agricultura-cuadros-estadisticos/#</a>                                                                                                                                                                                                                                                                                                                                                                                                                                                                                              |
|         |           |           | 1995      | crops                     | <b>AgroMaps:</b>                                                                                                                                                                                                                                                                                                                                                                                                                                                                                                                                                                                                                                                                                                                                                          |

|        |           |           |             |                           |                                                                                                                                                                                                                                                                                                                                                                                                                                                            |
|--------|-----------|-----------|-------------|---------------------------|------------------------------------------------------------------------------------------------------------------------------------------------------------------------------------------------------------------------------------------------------------------------------------------------------------------------------------------------------------------------------------------------------------------------------------------------------------|
|        |           |           |             |                           | <a href="https://gaez.fao.org/pages/agromaps">https://gaez.fao.org/pages/agromaps</a>                                                                                                                                                                                                                                                                                                                                                                      |
|        |           | Municipal | 1950        | crops                     | <b>Censo Nacional Agropecuario 1950:</b><br><a href="https://es.scribd.com/doc/152215679/I-Censo-Agropecuario1950?doc_id=152215679&amp;download=true&amp;order=611811074#">https://es.scribd.com/doc/152215679/I-Censo-Agropecuario1950?doc_id=152215679&amp;download=true&amp;order=611811074#</a>                                                                                                                                                        |
|        |           | National  |             |                           |                                                                                                                                                                                                                                                                                                                                                                                                                                                            |
|        | Land use  | State     | 1950        | Cropland, Pasture, Forest | <b>Censo Nacional Agropecuario 1950:</b><br><a href="https://es.scribd.com/doc/152215679/I-Censo-Agropecuario1950?doc_id=152215679&amp;download=true&amp;order=611811074#">https://es.scribd.com/doc/152215679/I-Censo-Agropecuario1950?doc_id=152215679&amp;download=true&amp;order=611811074#</a>                                                                                                                                                        |
|        |           |           | 1984        | Cropland, Pasture, Forest | <b>Censo Nacional Agropecuario 1984:</b><br><a href="https://www.scribd.com/doc/152218425/II-Censo-Agropecuario-1984">https://www.scribd.com/doc/152218425/II-Censo-Agropecuario-1984</a>                                                                                                                                                                                                                                                                  |
|        |           |           | 2013        | cropland                  | <b>Censo Nacional Agropecuario 2013:</b><br><a href="https://www.scribd.com/document/652777940/Censo-Agropecuario-Bolivia-Final">https://www.scribd.com/document/652777940/Censo-Agropecuario-Bolivia-Final</a>                                                                                                                                                                                                                                            |
|        |           | Municipal | 1950        | Cropland, Pasture, Forest | <b>Censo Nacional Agropecuario 1950:</b><br><a href="https://es.scribd.com/doc/152215679/I-Censo-Agropecuario1950?doc_id=152215679&amp;download=true&amp;order=611811074#">https://es.scribd.com/doc/152215679/I-Censo-Agropecuario1950?doc_id=152215679&amp;download=true&amp;order=611811074#</a>                                                                                                                                                        |
|        |           | State     | 2017 - 2020 | crops                     | <b>Companhia Nacional de abastecimento do Brazil (Conab)</b>                                                                                                                                                                                                                                                                                                                                                                                               |
| Brazil | Crop type | National  | 1940 - 1970 | crops                     | <a href="https://sidra.ibge.gov.br/pesquisa/censo-agropecuario/censo-agropecuario-1995-1996">https://sidra.ibge.gov.br/pesquisa/censo-agropecuario/censo-agropecuario-1995-1996</a>                                                                                                                                                                                                                                                                        |
|        |           | State     | 1970 - 2017 | crops                     | <a href="https://sidra.ibge.gov.br/pesquisa/censo-agropecuario/censo-agropecuario-1995-1996">https://sidra.ibge.gov.br/pesquisa/censo-agropecuario/censo-agropecuario-1995-1996</a><br><a href="https://www.ibge.gov.br/en/statistics/economic/agriculture-forestry-and-fishing/21929-2017-2017-censo-agropecuario-en.html">https://www.ibge.gov.br/en/statistics/economic/agriculture-forestry-and-fishing/21929-2017-2017-censo-agropecuario-en.html</a> |
| Chile  | Crop type | State     | 1997        | crops                     | <b>AgroMaps:</b><br><a href="https://gaez.fao.org/pages/agromaps">https://gaez.fao.org/pages/agromaps</a>                                                                                                                                                                                                                                                                                                                                                  |
|        |           |           | 2007        | crops                     | <b>Censo Nacional Agropecuario 2007:</b>                                                                                                                                                                                                                                                                                                                                                                                                                   |

|          |           |           |                     |                                 |                                                                                                                                                                                                                                                                                                |
|----------|-----------|-----------|---------------------|---------------------------------|------------------------------------------------------------------------------------------------------------------------------------------------------------------------------------------------------------------------------------------------------------------------------------------------|
|          |           |           |                     |                                 | <a href="https://www.ine.gob.cl/estadisticas/economia/agricultura-agroindustria-y-pesca/censos-agropecuarios">https://www.ine.gob.cl/estadisticas/economia/agricultura-agroindustria-y-pesca/censos-agropecuarios</a>                                                                          |
|          |           | Municipal | 2007                | crops                           | <b>Censo Nacional Agropecuario 2007:</b><br><a href="https://www.ine.gob.cl/estadisticas/economia/agricultura-agroindustria-y-pesca/censos-agropecuarios">https://www.ine.gob.cl/estadisticas/economia/agricultura-agroindustria-y-pesca/censos-agropecuarios</a>                              |
|          |           | State     | 1997                | Cropland,<br>Pasture,<br>Forest | <b>Censo Nacional Agropecuario 1997:</b><br><a href="https://www.fao.org/world-census-agriculture/wcarounds/wca2000/wca2000-country0/en/">https://www.fao.org/world-census-agriculture/wcarounds/wca2000/wca2000-country0/en/</a>                                                              |
|          | Land use  |           | 2007                | Cropland,<br>Pasture,<br>Forest | <b>Censo Nacional Agropecuario 2007:</b><br><a href="https://www.ine.gob.cl/estadisticas/economia/agricultura-agroindustria-y-pesca/censos-agropecuarios">https://www.ine.gob.cl/estadisticas/economia/agricultura-agroindustria-y-pesca/censos-agropecuarios</a>                              |
|          |           |           | 1976, 1997,<br>2007 | Pasture                         | <b>Structural changes in Chilean agriculture:</b><br><a href="https://www.ine.gob.cl/estadisticas/economia/agricultura-agroindustria-y-pesca/censos-agropecuarios">https://www.ine.gob.cl/estadisticas/economia/agricultura-agroindustria-y-pesca/censos-agropecuarios</a>                     |
|          |           |           | 2021                | Cropland,<br>Pasture,<br>Forest | <b>Censo Nacional Agropecuario 2021:</b><br><a href="https://www.ine.gob.cl/estadisticas/economia/agricultura-agroindustria-y-pesca/censos-agropecuarios">https://www.ine.gob.cl/estadisticas/economia/agricultura-agroindustria-y-pesca/censos-agropecuarios</a>                              |
|          |           | Municipal | 2007                | Cropland,<br>Pasture,<br>Forest | <b>Censo Nacional Agropecuario 2007:</b><br><a href="https://www.ine.gob.cl/estadisticas/economia/agricultura-agroindustria-y-pesca/censos-agropecuarios">https://www.ine.gob.cl/estadisticas/economia/agricultura-agroindustria-y-pesca/censos-agropecuarios</a>                              |
| Colombia | Crop type | State     | 1960                | crops                           | <b>Censo Nacional Agropecuario 1960:</b><br><a href="https://www.dane.gov.co/index.php/estadisticas-por-tema/agropecuario/censos-agropecuarios-de-colombia-1960-1970">https://www.dane.gov.co/index.php/estadisticas-por-tema/agropecuario/censos-agropecuarios-de-colombia-1960-1970</a>      |
|          |           |           | 1996, 2000          | crops                           | <b>AgroMaps:</b><br><a href="https://gaez.fao.org/pages/agromaps">https://gaez.fao.org/pages/agromaps</a>                                                                                                                                                                                      |
|          |           |           | 2011-2019           | crops                           | <b>National agricultural survey (historical time series):</b><br><a href="https://www.dane.gov.co/index.php/estadisticas-por-tema/agropecuario/encuesta-nacional-agropecuaria-ena">https://www.dane.gov.co/index.php/estadisticas-por-tema/agropecuario/encuesta-nacional-agropecuaria-ena</a> |
|          | Land use  | State     | 1960                | Cropland,<br>Pasture,<br>Forest | <b>Censo Nacional Agropecuario 1960:</b><br><a href="https://www.dane.gov.co/index.php/estadisticas-por-tema/agropecuario/censos-agropecuarios-de-colombia-1960-1970">https://www.dane.gov.co/index.php/estadisticas-por-tema/agropecuario/censos-agropecuarios-de-colombia-1960-1970</a>      |

|         |           |           |           |                                 |                                                                                                                                                                                                                                                                                                |
|---------|-----------|-----------|-----------|---------------------------------|------------------------------------------------------------------------------------------------------------------------------------------------------------------------------------------------------------------------------------------------------------------------------------------------|
|         |           |           | 1970      | Cropland,<br>Pasture            | <b>Censo Nacional Agropecuario 1970:</b><br><a href="https://www.dane.gov.co/index.php/estadisticas-por-tema/agropecuario/censos-agropecuarios-de-colombia-1960-1970">https://www.dane.gov.co/index.php/estadisticas-por-tema/agropecuario/censos-agropecuarios-de-colombia-1960-1970</a>      |
|         |           |           | 2011-2019 | Cropland,<br>Pasture,<br>Forest | <b>National agricultural survey (historical time series):</b><br><a href="https://www.dane.gov.co/index.php/estadisticas-por-tema/agropecuario/encuesta-nacional-agropecuaria-ena">https://www.dane.gov.co/index.php/estadisticas-por-tema/agropecuario/encuesta-nacional-agropecuaria-ena</a> |
|         |           | Municipal | 1960      | Cropland,<br>Pasture,<br>Forest | <b>Censo Nacional Agropecuario 1960:</b><br><a href="https://www.dane.gov.co/index.php/estadisticas-por-tema/agropecuario/censos-agropecuarios-de-colombia-1960-1970">https://www.dane.gov.co/index.php/estadisticas-por-tema/agropecuario/censos-agropecuarios-de-colombia-1960-1970</a>      |
| Ecuador | Crop type | State     | 1995      | crops                           | <b>AgroMaps:</b><br><a href="https://gaez.fao.org/pages/agromaps">https://gaez.fao.org/pages/agromaps</a>                                                                                                                                                                                      |
|         |           |           | 2000      | Crops<br>No wheat               | <b>Resultados_Nacionales_con_resumenes_Provinciales_2000:</b><br><a href="https://www.ecuadorencifras.gob.ec/censo-nacional-agropecuario/">https://www.ecuadorencifras.gob.ec/censo-nacional-agropecuario/</a>                                                                                 |
|         |           |           | 2022      | Crops                           | <b>ESPAC_2022:</b><br><a href="https://www.ecuadorencifras.gob.ec/estadisticas-agropecuarias-2/">https://www.ecuadorencifras.gob.ec/estadisticas-agropecuarias-2/</a>                                                                                                                          |
|         | Land use  | State     | 2000      | Cropland,<br>Pasture,<br>Forest | <b>Resultados_Nacionales_con_resumenes_Provinciales_2000:</b><br><a href="https://www.ecuadorencifras.gob.ec/censo-nacional-agropecuario/">https://www.ecuadorencifras.gob.ec/censo-nacional-agropecuario/</a>                                                                                 |
|         |           |           | 2022      | Cropland,<br>Pasture,<br>Forest | <b>ESPAC_2022:</b><br><a href="https://www.ecuadorencifras.gob.ec/estadisticas-agropecuarias-2/">https://www.ecuadorencifras.gob.ec/estadisticas-agropecuarias-2/</a>                                                                                                                          |
| Guyana  | Crop type | National  | 1960-2016 | Rice                            | <b>Annual report 2016 and Semples Agricultural Change:</b><br><a href="https://grdb.gy/category/annual-reports/">https://grdb.gy/category/annual-reports/</a>                                                                                                                                  |
|         |           | State     | 1994      | Rice                            | <b>AgroMaps:</b><br><a href="https://gaez.fao.org/pages/agromaps">https://gaez.fao.org/pages/agromaps</a>                                                                                                                                                                                      |
|         |           |           | 2007-2016 | Rice                            | <b>Annual report:</b><br><a href="https://grdb.gy/category/annual-reports/">https://grdb.gy/category/annual-reports/</a>                                                                                                                                                                       |

|          |           |       |           |                                 |                                                                                                                                                                                                                                                                   |
|----------|-----------|-------|-----------|---------------------------------|-------------------------------------------------------------------------------------------------------------------------------------------------------------------------------------------------------------------------------------------------------------------|
|          |           |       | 1991      | crops                           | <b>AgroMaps:</b><br><a href="https://gaez.fao.org/pages/agromaps">https://gaez.fao.org/pages/agromaps</a>                                                                                                                                                         |
| Paraguay | Crop type | State | 2000-2021 | Crops                           | <b>INE 2000-2021:</b><br><a href="https://www.ine.gov.py/publicacion/16/anuario">https://www.ine.gov.py/publicacion/16/anuario</a>                                                                                                                                |
|          |           |       | 2008      | Crops                           | <b>Agricultural census 2008: PRY_SPA_REP.VOL1</b><br><a href="https://www.fao.org/world-census-agriculture/wcarounds/wca2010/countries2010/en/">https://www.fao.org/world-census-agriculture/wcarounds/wca2010/countries2010/en/</a>                              |
|          |           |       | 2022      | Crops                           | <b>Agricultural census 2022:</b><br><a href="https://www.fao.org/world-census-agriculture/wcarounds/wca2010/countries2010/en/">https://www.fao.org/world-census-agriculture/wcarounds/wca2010/countries2010/en/</a>                                               |
|          |           |       | 2008      | Cropland,<br>Pasture,<br>Forest | <b>Agricultural census 2008: PRY_SPA_REP.VOL1</b><br><a href="https://www.fao.org/world-census-agriculture/wcarounds/wca2010/countries2010/en/">https://www.fao.org/world-census-agriculture/wcarounds/wca2010/countries2010/en/</a>                              |
|          | Land use  | State | 2022      | Cropland,<br>Pasture,<br>Forest | <b>Agricultural census 2022:</b><br><a href="https://www.fao.org/world-census-agriculture/wcarounds/wca2010/countries2010/en/">https://www.fao.org/world-census-agriculture/wcarounds/wca2010/countries2010/en/</a>                                               |
|          |           |       | 1929      | Crops                           | <b>Agricultural census 1929:</b><br><a href="https://www.scribd.com/document/360750048/1972-Honorio-Pinto-El-Primer-Censo-Agropecuario-Del-Peru-1929">https://www.scribd.com/document/360750048/1972-Honorio-Pinto-El-Primer-Censo-Agropecuario-Del-Peru-1929</a> |
| Peru     | Crop type | State | 1993      | crops                           | <b>AgroMaps:</b><br><a href="https://gaez.fao.org/pages/agromaps">https://gaez.fao.org/pages/agromaps</a>                                                                                                                                                         |
|          |           |       | 2012      | Cropland,<br>Pasture,<br>Forest | <b>Agricultural census 2012:</b><br><a href="https://microdata.fao.org/index.php/catalog/1616/related-materials">https://microdata.fao.org/index.php/catalog/1616/related-materials</a>                                                                           |
|          | Land use  | State | 1995      | Crops                           | <b>AgroMaps:</b><br><a href="https://gaez.fao.org/pages/agromaps">https://gaez.fao.org/pages/agromaps</a>                                                                                                                                                         |
| Suriname | Crop type | State | 2008      | Crops                           | <b>Agricultural census 2008:</b><br><a href="https://www.fao.org/world-census-agriculture/wcarounds/wca2010/countries2010/en/">https://www.fao.org/world-census-agriculture/wcarounds/wca2010/countries2010/en/</a>                                               |
|          |           |       | 1995      | Crops                           | <b>AgroMaps:</b><br><a href="https://gaez.fao.org/pages/agromaps">https://gaez.fao.org/pages/agromaps</a>                                                                                                                                                         |
|          | Land use  | State | 2008      | Cropland,                       | <b>Agricultural census 2008:</b>                                                                                                                                                                                                                                  |



|           |           |       |            |                    |                                                                                                                                                                                 |
|-----------|-----------|-------|------------|--------------------|---------------------------------------------------------------------------------------------------------------------------------------------------------------------------------|
|           |           |       |            | Pasture,<br>Forest | <a href="https://www.fao.org/world-census-agriculture/wcarounds/wca2010/countries2010/en/">https://www.fao.org/world-census-agriculture/wcarounds/wca2010/countries2010/en/</a> |
| Uruguay   | Crop type | State | 1990, 2000 | Crops              | <b>AgroMaps:</b><br><a href="https://gaez.fao.org/pages/agromaps">https://gaez.fao.org/pages/agromaps</a>                                                                       |
| Venezuela | Crop type | State | 1995       | Crops              | <b>AgroMaps:</b><br><a href="https://gaez.fao.org/pages/agromaps">https://gaez.fao.org/pages/agromaps</a>                                                                       |
